# Supplementary material
Source: publisher figshare collection journal article supplement (https://aacr.figshare.com/ndownloader/files/39923846)
Supplement: Supplementary file 1 [file 39923846]

## Sheet: A. Placebo_diff_ expression
Genes	log2FoldChange	pvalue	padj	modulation
CACNG4	-1.69705	0.000964262	0.0401996	suppressed
TOP2A	-1.68459	2.99e-05	0.00249358	suppressed
AURKA	-1.6397	0.00134098	0.0495267	suppressed
WNK4	-1.39776	0.00051758	0.0241162	suppressed
AGR3	-1.30061	0.000220444	0.0124724	suppressed
MKI67	-1.25583	0.000549291	0.0252961	suppressed
NPY1R	-1.2291	9.41e-05	0.00626503	suppressed
ARHGAP11B	-1.1226	0.000541013	0.0250606	suppressed
ESR1	-1.0422	0.00125038	0.0478465	suppressed
GSN	1.00268	1.87e-09	9.28e-07	enhanced
ANXA1	1.01521	6.07e-06	0.000667238	enhanced
PFKFB3	1.03294	7.36e-05	0.00513998	enhanced
SPRY2	1.04874	4.48e-05	0.00344721	enhanced
CPED1	1.06382	0.000413265	0.0202066	enhanced
ZFP36L2	1.06555	5.91e-07	9.55e-05	enhanced
CYP1B1	1.06914	5.55e-05	0.00407092	enhanced
MMP2	1.07501	2.69e-07	5.08e-05	enhanced
CAV1	1.07828	4.63e-06	0.000531421	enhanced
ETS2	1.08666	1.14e-05	0.00111718	enhanced
CCDC80	1.09134	1.38e-06	0.000206325	enhanced
CTSK	1.09359	5.97e-08	1.51e-05	enhanced
MCL1	1.09448	1.29e-07	2.92e-05	enhanced
JUND	1.11447	1.35e-08	4.86e-06	enhanced
ALDH1A1	1.11671	0.00129434	0.0488212	enhanced
CRYAB	1.12074	1.25e-05	0.00121135	enhanced
ANK2	1.12346	0.000121052	0.00767082	enhanced
MME	1.12721	0.000670426	0.0295025	enhanced
CDKN1A	1.12875	4.28e-06	0.000513223	enhanced
PLTP	1.1369	1.13e-09	6.89e-07	enhanced
NNMT	1.1551	2.2e-05	0.00196044	enhanced
CD163	1.159	0.000507607	0.0240577	enhanced
ENPP2	1.18491	0.000101097	0.0065105	enhanced
IGFBP6	1.19793	0.000801359	0.0344976	enhanced
AKR1C1	1.19826	0.000160236	0.00961537	enhanced
TNFAIP3	1.20429	0.000230525	0.0126982	enhanced
MYC	1.20794	0.000556359	0.0254735	enhanced
CCL14	1.22511	3.93e-06	0.000486018	enhanced
AKAP12	1.22553	0.00127974	0.0485015	enhanced
MYH11	1.22788	0.000996318	0.0413185	enhanced
CEBPB	1.23376	1.04e-06	0.000164675	enhanced
KLF2	1.23669	7.54e-06	0.000796236	enhanced
NAMPT	1.24008	6.99e-06	0.000748659	enhanced
MAP3K8	1.24639	0.000230847	0.0126982	enhanced
PLIN2	1.30215	0.000154688	0.00938084	enhanced
SPRY1	1.30286	8.21e-05	0.00555608	enhanced
ICAM1	1.315	4.44e-06	0.000517771	enhanced
SOD2	1.325	1.36e-09	7.7e-07	enhanced
APOD	1.34328	5.49e-08	1.5e-05	enhanced
CXCR4	1.34946	3.45e-05	0.00281704	enhanced
EGFLAM	1.35291	0.00104802	0.042571	enhanced
SRPX	1.35578	0.000641973	0.0285678	enhanced
CLEC3B	1.36013	2.64e-05	0.00222096	enhanced
ITIH5	1.36024	0.000139259	0.00861771	enhanced
ABI3BP	1.3652	1.69e-07	3.31e-05	enhanced
DPT	1.37483	0.000183362	0.0106795	enhanced
GPX3	1.38981	3.25e-09	1.43e-06	enhanced
CFD	1.39349	1.5e-07	3.05e-05	enhanced
BTNL9	1.39712	0.00110241	0.044422	enhanced
LIPE	1.40599	0.000227073	0.0126665	enhanced
CES1	1.41667	4.33e-08	1.27e-05	enhanced
FGF7	1.42391	0.000412942	0.0202066	enhanced
CPXM1	1.4275	0.000164805	0.0098152	enhanced
CCL4	1.43165	2.03e-05	0.00182368	enhanced
CCL4L1	1.45415	0.000334651	0.0168839	enhanced
MRC1L1	1.45523	4.15e-06	0.000506018	enhanced
DARC	1.46142	0.000286811	0.0152472	enhanced
CHRDL1	1.46725	3.41e-06	0.000428271	enhanced
GADD45B	1.47194	0.000199959	0.0114774	enhanced
SGK1	1.47283	1.7e-06	0.000245529	enhanced
MRC1	1.47785	6.45e-06	0.000699898	enhanced
PLIN1	1.47925	2.2e-06	0.000299981	enhanced
G0S2	1.48176	0.000334518	0.0168839	enhanced
FHL1	1.48368	9.78e-05	0.00640091	enhanced
MT1X	1.48476	7.89e-06	0.000822107	enhanced
RBP4	1.48515	3.75e-05	0.00302989	enhanced
SRGN	1.49385	3.06e-07	5.64e-05	enhanced
CR1	1.4946	0.000120794	0.00767082	enhanced
TNXB	1.51631	1.8e-05	0.00167794	enhanced
HSPB6	1.51786	0.00026607	0.0145348	enhanced
AKR1C2	1.54069	1.76e-05	0.00166027	enhanced
CTGF	1.54232	1.7e-06	0.000245529	enhanced
CD36	1.54667	3.29e-07	5.79e-05	enhanced
SAA1	1.5515	1.8e-08	5.72e-06	enhanced
KLF6	1.55325	6.11e-11	4.84e-08	enhanced
MT2A	1.55519	5.71e-11	4.84e-08	enhanced
IER2	1.56483	0.000171027	0.0100349	enhanced
PRG4	1.5715	4.1e-05	0.00325009	enhanced
GPD1	1.5777	2.61e-05	0.00222096	enhanced
EGFR	1.58939	4.67e-05	0.00348678	enhanced
LPL	1.59606	1.5e-08	5.16e-06	enhanced
AQP7	1.63418	8.1e-05	0.00553392	enhanced
ADAMTS9	1.73737	0.000135085	0.00842528	enhanced
CSRNP1	1.73949	7.15e-05	0.00508716	enhanced
CIDEC	1.76109	0.000211752	0.0120668	enhanced
ADH1B	1.77565	2.51e-05	0.0021611	enhanced
SERPINE1	1.77782	2.27e-06	0.00030476	enhanced
SLC19A3	1.81963	9.41e-05	0.00626503	enhanced
CCL3	1.8437	1.19e-06	0.000184276	enhanced
CCL2	1.90168	4.66e-05	0.00348678	enhanced
GEM	2.0045	1.26e-06	0.000192458	enhanced
JUNB	2.0209	5.12e-10	3.69e-07	enhanced
SLC2A3	2.06975	3.35e-12	5.23e-09	enhanced
PDK4	2.10154	3.15e-07	5.66e-05	enhanced
C11orf96	2.11058	3.72e-08	1.13e-05	enhanced
ADAMTS1	2.18761	3.97e-12	5.23e-09	enhanced
EGR2	2.19423	8.76e-08	2.04e-05	enhanced
KLF4	2.21934	1.44e-07	3.05e-05	enhanced
FABP4	2.22587	8.52e-09	3.38e-06	enhanced
MT1M	2.23424	0.000627374	0.0280759	enhanced
SAA2	2.27841	1.52e-09	8.03e-07	enhanced
PTGDS	2.28262	1.85e-11	1.83e-08	enhanced
ATF3	2.39205	6.16e-09	2.57e-06	enhanced
JUN	2.68213	2.6e-09	1.21e-06	enhanced
RASD1	2.85917	1.49e-07	3.05e-05	enhanced
RGS2	2.92695	1.75e-08	5.72e-06	enhanced
ZFP36	2.94773	1.19e-24	9.44e-21	enhanced
TNNT3	3.04612	9.85e-10	6.5e-07	enhanced
CYR61	3.07009	2.86e-14	5.67e-11	enhanced
RGS1	3.60803	5.01e-12	5.67e-09	enhanced
NR4A1	3.66586	2.27e-23	8.97e-20	enhanced
EGR1	3.68897	1.33e-07	2.92e-05	enhanced
DUSP1	3.79118	1.78e-18	4.71e-15	enhanced
FOS	5.15569	3.24e-06	0.000414464	enhanced
FOSB	5.3536	6.04e-08	1.51e-05	enhanced

## Sheet: B. Placebo_Pathway analysis
ID	Description	setSize	enrichmentScore	NES	pvalue	p.adjust	qvalues	rank	leading_edge	core_enrichment
2454202	Fc epsilon receptor (FCERI) signaling	6	0.657674	1.64208	0.0293686	0.241859	0.218219	122	tags=100%, list=100%, signal=0%	FOS/NR4A1/JUN/EGFR/FGF7/CDKN1A
168898	Toll-Like Receptors Cascades	4	0.663276	1.41911	0.0848287	0.359879	0.324703	1	tags=25%, list=1%, signal=26%
2559583	Cellular Senescence	5	0.608942	1.43428	0.100152	0.41239	0.372081	122	tags=100%, list=100%, signal=0%	FOS/JUN/CEBPB/CDKN1A/ETS2
168256	Immune System	16	0.403257	1.35771	0.135531	0.527066	0.475548	122	tags=100%, list=100%, signal=0%	FOS/EGR1/NR4A1/JUN/EGFR/MT2A/SAA1/CD36/CR1/FGF7/CFD/ICAM1/MAP3K8/TNFAIP3/CDKN1A/CTSK
74160	Gene Expression	7	0.515623	1.33279	0.152518	0.577095	0.520687	122	tags=100%, list=100%, signal=0%	NR4A1/ZFP36/JUNB/SERPINE1/CTGF/MYC/ESR1
168249	Innate Immune System	12	0.398907	1.23448	0.229487	0.698439	0.630171	122	tags=100%, list=100%, signal=0%	FOS/NR4A1/JUN/EGFR/SAA1/CD36/CR1/FGF7/CFD/TNFAIP3/CDKN1A/CTSK
2262752	Cellular responses to stress	7	0.472816	1.22214	0.227338	0.698439	0.630171	122	tags=100%, list=100%, signal=0%	FOS/JUN/GPX3/SOD2/CEBPB/CDKN1A/ETS2
211859	Biological oxidations	4	-0.424149	-1.05136	0.369231	0.80526	0.726551	122	tags=100%, list=100%, signal=0%	ADH1B/NNMT/ALDH1A1/CYP1B1
422475	Axon guidance	4	-0.378035	-0.937056	0.54359	0.80526	0.726551	122	tags=100%, list=100%, signal=0%	EGFR/MYH11/ANK2/MMP2
418594	G alpha (i) signalling events	4	-0.359919	-0.89215	0.6	0.80526	0.726551	122	tags=100%, list=100%, signal=0%	SAA1/CXCR4/ANXA1/NPY1R
388396	GPCR downstream signaling	4	-0.359919	-0.89215	0.6	0.80526	0.726551	122	tags=100%, list=100%, signal=0%	SAA1/CXCR4/ANXA1/NPY1R
1430728	Metabolism	20	0.284008	1.03311	0.425947	0.80526	0.726551	122	tags=100%, list=100%, signal=0%	PTGDS/FABP4/PDK4/SLC2A3/SLC19A3/ADH1B/LPL/GPD1/CD36/CTGF/G0S2/PLIN1/LIPE/PLIN2/NAMPT/NNMT/ALDH1A1/CAV1/CYP1B1/PFKFB3
556833	Metabolism of lipids and lipoproteins	11	0.369858	1.11337	0.336375	0.80526	0.726551	122	tags=100%, list=100%, signal=0%	PTGDS/FABP4/LPL/GPD1/CD36/CTGF/G0S2/PLIN1/LIPE/PLIN2/CYP1B1
190236	Signaling by FGFR	5	0.379723	0.894387	0.603945	0.80526	0.726551	122	tags=100%, list=100%, signal=0%	NR4A1/EGFR/FGF7/CDKN1A/SPRY2
5654736	Signaling by FGFR1	5	0.379723	0.894387	0.603945	0.80526	0.726551	122	tags=100%, list=100%, signal=0%	NR4A1/EGFR/FGF7/CDKN1A/SPRY2
5654738	Signaling by FGFR2	5	0.379723	0.894387	0.603945	0.80526	0.726551	122	tags=100%, list=100%, signal=0%	NR4A1/EGFR/FGF7/CDKN1A/SPRY2
5654741	Signaling by FGFR3	5	0.379723	0.894387	0.603945	0.80526	0.726551	122	tags=100%, list=100%, signal=0%	NR4A1/EGFR/FGF7/CDKN1A/SPRY2
5654743	Signaling by FGFR4	5	0.379723	0.894387	0.603945	0.80526	0.726551	122	tags=100%, list=100%, signal=0%	NR4A1/EGFR/FGF7/CDKN1A/SPRY2
1236394	Signaling by ERBB4	5	0.380029	0.895108	0.603945	0.80526	0.726551	122	tags=100%, list=100%, signal=0%	NR4A1/EGFR/FGF7/CDKN1A/ESR1
535734	Fatty acid, triacylglycerol, and ketone body metabolism	5	0.406425	0.957281	0.525038	0.80526	0.726551	122	tags=100%, list=100%, signal=0%	GPD1/CD36/CTGF/G0S2/PLIN2
381340	Transcriptional regulation of white adipocyte differentiation	5	0.419987	0.989224	0.485584	0.80526	0.726551	1	tags=20%, list=1%, signal=21%
2172127	DAP12 interactions	4	0.435608	0.932002	0.553018	0.80526	0.726551	122	tags=100%, list=100%, signal=0%	NR4A1/EGFR/FGF7/CDKN1A
2424491	DAP12 signaling	4	0.435608	0.932002	0.553018	0.80526	0.726551	122	tags=100%, list=100%, signal=0%	NR4A1/EGFR/FGF7/CDKN1A
186763	Downstream signal transduction	4	0.435608	0.932002	0.553018	0.80526	0.726551	122	tags=100%, list=100%, signal=0%	NR4A1/EGFR/FGF7/CDKN1A
1168372	Downstream signaling events of B Cell Receptor (BCR)	4	0.435608	0.932002	0.553018	0.80526	0.726551	122	tags=100%, list=100%, signal=0%	NR4A1/EGFR/FGF7/CDKN1A
5654687	Downstream signaling of activated FGFR1	4	0.435608	0.932002	0.553018	0.80526	0.726551	122	tags=100%, list=100%, signal=0%	NR4A1/EGFR/FGF7/CDKN1A
5654696	Downstream signaling of activated FGFR2	4	0.435608	0.932002	0.553018	0.80526	0.726551	122	tags=100%, list=100%, signal=0%	NR4A1/EGFR/FGF7/CDKN1A
5654708	Downstream signaling of activated FGFR3	4	0.435608	0.932002	0.553018	0.80526	0.726551	122	tags=100%, list=100%, signal=0%	NR4A1/EGFR/FGF7/CDKN1A
5654716	Downstream signaling of activated FGFR4	4	0.435608	0.932002	0.553018	0.80526	0.726551	122	tags=100%, list=100%, signal=0%	NR4A1/EGFR/FGF7/CDKN1A
180292	GAB1 signalosome	4	0.435608	0.932002	0.553018	0.80526	0.726551	1	tags=25%, list=1%, signal=26%
187037	NGF signalling via TRKA from the plasma membrane	4	0.435608	0.932002	0.553018	0.80526	0.726551	122	tags=100%, list=100%, signal=0%	NR4A1/EGFR/FGF7/CDKN1A
5654689	PI-3K cascade:FGFR1	4	0.435608	0.932002	0.553018	0.80526	0.726551	1	tags=25%, list=1%, signal=26%
5654695	PI-3K cascade:FGFR2	4	0.435608	0.932002	0.553018	0.80526	0.726551	1	tags=25%, list=1%, signal=26%
5654710	PI-3K cascade:FGFR3	4	0.435608	0.932002	0.553018	0.80526	0.726551	1	tags=25%, list=1%, signal=26%
5654720	PI-3K cascade:FGFR4	4	0.435608	0.932002	0.553018	0.80526	0.726551	1	tags=25%, list=1%, signal=26%
1963642	PI3K events in ERBB2 signaling	4	0.435608	0.932002	0.553018	0.80526	0.726551	1	tags=25%, list=1%, signal=26%
1250342	PI3K events in ERBB4 signaling	4	0.435608	0.932002	0.553018	0.80526	0.726551	1	tags=25%, list=1%, signal=26%
198203	PI3K/AKT activation	4	0.435608	0.932002	0.553018	0.80526	0.726551	1	tags=25%, list=1%, signal=26%
2219528	PI3K/AKT Signaling in Cancer	4	0.435608	0.932002	0.553018	0.80526	0.726551	1	tags=25%, list=1%, signal=26%
1257604	PIP3 activates AKT signaling	4	0.435608	0.932002	0.553018	0.80526	0.726551	1	tags=25%, list=1%, signal=26%
2730905	Role of LAT2/NTAL/LAB on calcium mobilization	4	0.435608	0.932002	0.553018	0.80526	0.726551	1	tags=25%, list=1%, signal=26%
1227986	Signaling by ERBB2	4	0.435608	0.932002	0.553018	0.80526	0.726551	122	tags=100%, list=100%, signal=0%	NR4A1/EGFR/FGF7/CDKN1A
186797	Signaling by PDGF	4	0.435608	0.932002	0.553018	0.80526	0.726551	122	tags=100%, list=100%, signal=0%	NR4A1/EGFR/FGF7/CDKN1A
1433557	Signaling by SCF-KIT	4	0.435608	0.932002	0.553018	0.80526	0.726551	122	tags=100%, list=100%, signal=0%	NR4A1/EGFR/FGF7/CDKN1A
983705	Signaling by the B Cell Receptor (BCR)	4	0.435608	0.932002	0.553018	0.80526	0.726551	122	tags=100%, list=100%, signal=0%	NR4A1/EGFR/FGF7/CDKN1A
166520	Signalling by NGF	4	0.435608	0.932002	0.553018	0.80526	0.726551	122	tags=100%, list=100%, signal=0%	NR4A1/EGFR/FGF7/CDKN1A
1280215	Cytokine Signaling in Immune system	4	0.447184	0.956771	0.533442	0.80526	0.726551	122	tags=100%, list=100%, signal=0%	EGR1/MT2A/ICAM1/MAP3K8
212436	Generic Transcription Pathway	6	0.455285	1.13675	0.309838	0.80526	0.726551	122	tags=100%, list=100%, signal=0%	NR4A1/JUNB/SERPINE1/CTGF/MYC/ESR1
76002	Platelet activation, signaling and aggregation	4	0.474576	1.01538	0.463295	0.80526	0.726551	122	tags=100%, list=100%, signal=0%	SERPINE1/CD36/SRGN/CFD
114608	Platelet degranulation	4	0.474576	1.01538	0.463295	0.80526	0.726551	1	tags=25%, list=1%, signal=26%
76005	Response to elevated platelet cytosolic Ca2+	4	0.474576	1.01538	0.463295	0.80526	0.726551	1	tags=25%, list=1%, signal=26%
73923	Lipid digestion, mobilization, and transport	4	0.491525	1.05164	0.417618	0.80526	0.726551	1	tags=50%, list=1%, signal=51%	LIPE
380108	Chemokine receptors bind chemokines	4	0.40678	0.870323	0.634584	0.83813	0.756207	1	tags=100%, list=1%, signal=103%	CCL3/CCL4/CXCR4
392499	Metabolism of proteins	5	0.352942	0.83131	0.670713	0.869443	0.78446	122	tags=100%, list=100%, signal=0%	ATF3/CCL2/IGFBP6/MME/MMP2
177929	Signaling by EGFR	6	0.326348	0.814823	0.684288	0.877661	0.791875	122	tags=100%, list=100%, signal=0%	NR4A1/EGFR/FGF7/SPRY1/CDKN1A/SPRY2
1266738	Developmental Biology	10	0.267178	0.779527	0.735294	0.896072	0.808486	122	tags=100%, list=100%, signal=0%	FABP4/KLF4/LPL/EGFR/CD36/PLIN1/CEBPB/MYH11/ANK2/MMP2
5663202	Diseases of signal transduction	6	0.314614	0.785525	0.720999	0.896072	0.808486	122	tags=100%, list=100%, signal=0%	NR4A1/EGFR/RBP4/FGF7/MYC/CDKN1A
109582	Hemostasis	5	0.322175	0.758842	0.746586	0.901052	0.812979	122	tags=100%, list=100%, signal=0%	SERPINE1/CD36/SRGN/CFD/CAV1
1474244	Extracellular matrix organization	4	-0.297696	-0.737915	0.776923	0.904801	0.816362	122	tags=100%, list=100%, signal=0%	SERPINE1/ICAM1/CTSK/MMP2
1989781	PPARA activates gene expression	4	0.364407	0.779664	0.766721	0.904801	0.816362	81	tags=100%, list=66%, signal=35%	CTGF/G0S2/PLIN2
400206	Regulation of lipid metabolism by Peroxisome proliferator-activated receptor alpha (PPARalpha)	4	0.364407	0.779664	0.766721	0.904801	0.816362	1	tags=100%, list=1%, signal=103%	CTGF/G0S2/PLIN2
373076	Class A/1 (Rhodopsin-like receptors)	7	-0.217391	-0.686539	0.86645	0.948989	0.856231	122	tags=100%, list=100%, signal=0%	CCL2/CCL3/SAA1/CCL4/CXCR4/ANXA1/NPY1R
500792	GPCR ligand binding	7	-0.217391	-0.686539	0.86645	0.948989	0.856231	122	tags=100%, list=100%, signal=0%	CCL2/CCL3/SAA1/CCL4/CXCR4/ANXA1/NPY1R
375276	Peptide ligand-binding receptors	7	-0.217391	-0.686539	0.86645	0.948989	0.856231	122	tags=100%, list=100%, signal=0%	CCL2/CCL3/SAA1/CCL4/CXCR4/ANXA1/NPY1R
162582	Signal Transduction	27	0.164747	0.645016	0.848321	0.948989	0.856231	122	tags=100%, list=100%, signal=0%	NR4A1/PDK4/JUNB/CCL2/CCL3/SERPINE1/ADH1B/LPL/EGFR/SAA1/RBP4/CHRDL1/CCL4/FGF7/CXCR4/SPRY1/MYH11/MYC/AKR1C1/CDKN1A/ALDH1A1/CAV1/SPRY2/ANXA1/ESR1/ARHGAP11B/NPY1R
1643685	Disease	10	0.215002	0.627296	0.867647	0.948989	0.856231	122	tags=100%, list=100%, signal=0%	NR4A1/EGFR/SAA1/CD36/RBP4/FGF7/CXCR4/MYC/CDKN1A/GSN
372790	Signaling by GPCR	8	0.244777	0.671469	0.847411	0.948989	0.856231	122	tags=100%, list=100%, signal=0%	CCL2/CCL3/EGFR/SAA1/CCL4/CXCR4/ANXA1/NPY1R
1280218	Adaptive Immune System	7	0.27286	0.70529	0.828777	0.948989	0.856231	122	tags=100%, list=100%, signal=0%	NR4A1/EGFR/CD36/FGF7/ICAM1/MAP3K8/CDKN1A
